# Supplementary material for: The conserved protective cyclic AMP-phosphodiesterase function PDE4B is expressed in the adenoma and adjacent normal colonic epithelium of mammals and silenced in colorectal cancer
Source: PubMed Central journal article supplement (PMC6143270; doi:10.1371/journal.pgen.1007611), 2018-09-06
Supplement: pgen.1007611.s001.pdf [file pgen.1007611.s001.pdf]

**S1 Table.** Test of effect of the *Pde4b* genotype on the number of adenomas in the small intestine of *Apc<sup>Min/+</sup>* mice over a series of backcross-intercross generations. Gross tumor numbers were measured in the small intestines of *Apc<sup>Min/+</sup>* mice from the series of backcross-intercross generations, carrying the *Pde4b<sup>+/+</sup>*, *Pde4b<sup>+/-</sup>* and *Pde4b<sup>-/-</sup>* genotypes.

| Genotype | Small intestinal tumor counts, mean $\pm$ SD (n of mice) |                                                |                                                |
|----------|----------------------------------------------------------|------------------------------------------------|------------------------------------------------|
|          | <i>Apc<sup>Min/+</sup> Pde4b<sup>+/+</sup></i>           | <i>Apc<sup>Min/+</sup> Pde4b<sup>+/-</sup></i> | <i>Apc<sup>Min/+</sup> Pde4b<sup>-/-</sup></i> |
| F2       | 78.5 $\pm$ 32.4 (6)                                      | 81.8 $\pm$ 32.1 (13)                           | 66.7 $\pm$ 24.0 (6)                            |
| N2F2     | 87.0 $\pm$ 34.1 (46)                                     | 93.5 $\pm$ 42.9 (86)                           | 92.4 $\pm$ 41.0 (31)                           |
| N3F2     | 107.2 $\pm$ 28.6 (23)                                    | 117.5 $\pm$ 33.8 (27)                          | 125.3 $\pm$ 36.2 (9)                           |
| N4F2     | 111.7 $\pm$ 43.7 (9)                                     | 125.9 $\pm$ 46.9 (15)                          | 103.1 $\pm$ 35.7 (8)                           |
