# Supplementary material for: The conserved protective cyclic AMP-phosphodiesterase function PDE4B is expressed in the adenoma and adjacent normal colonic epithelium of mammals and silenced in colorectal cancer
Source: PubMed Central journal article supplement (PMC6143270; doi:10.1371/journal.pgen.1007611), 2018-09-06
Supplement: pgen.1007611.s002.pdf [file pgen.1007611.s002.pdf]

**S2 Table.** Results of gene-set enrichment analysis for 75 genes associated with increased expression in colonic adenoma in all three genera. Shown are enriched GO terms at z-score exceeding 5.0 ( $p < 1e-6$ ), set size at least 10 genes, and containing at least 3 adenoma-associated genes. Below, column set.mean is the proportion of the GO category that are triply conserved adenoma-associated genes. Computed with *allez* [70].

| ID         | Term                                                       | Ontology | set.mean | set.size | z.score |
|------------|------------------------------------------------------------|----------|----------|----------|---------|
| GO:2000052 | positive regulation of non-canonical Wnt signaling pathway | BP       | 0.23077  | 13       | 11.807  |
| GO:0001780 | neutrophil homeostasis                                     | BP       | 0.15789  | 19       | 9.673   |
| GO:1902624 | positive regulation of neutrophil migration                | BP       | 0.15625  | 32       | 12.423  |
| GO:0090023 | positive regulation of neutrophil chemotaxis               | BP       | 0.15385  | 26       | 11.018  |
| GO:0071624 | positive regulation of granulocyte chemotaxis              | BP       | 0.14815  | 27       | 10.799  |
| GO:2000050 | regulation of non-canonical Wnt signaling pathway          | BP       | 0.13636  | 22       | 8.945   |
| GO:0090022 | regulation of neutrophil chemotaxis                        | BP       | 0.13333  | 30       | 10.208  |
| GO:1902622 | regulation of neutrophil migration                         | BP       | 0.13158  | 38       | 11.335  |
| GO:0003401 | axis elongation                                            | BP       | 0.10345  | 29       | 7.703   |
| GO:0032743 | positive regulation of interleukin-2 production            | BP       | 0.1      | 30       | 7.561   |
| GO:0071622 | regulation of granulocyte chemotaxis                       | BP       | 0.08889  | 45       | 8.183   |
| GO:0060412 | ventricular septum morphogenesis                           | BP       | 0.08108  | 37       | 6.73    |
| GO:0032729 | positive regulation of interferon-gamma production         | BP       | 0.08065  | 62       | 8.669   |
| GO:0048146 | positive regulation of fibroblast proliferation            | BP       | 0.08065  | 62       | 8.669   |
| GO:0002690 | positive regulation of leukocyte chemotaxis                | BP       | 0.07792  | 77       | 9.318   |
| GO:1990266 | neutrophil migration                                       | BP       | 0.07229  | 83       | 8.931   |
| GO:0030593 | neutrophil chemotaxis                                      | BP       | 0.06944  | 72       | 7.965   |
| GO:0035567 | non-canonical Wnt signaling pathway                        | BP       | 0.06667  | 45       | 6.021   |
| GO:0002688 | regulation of leukocyte chemotaxis                         | BP       | 0.06383  | 94       | 8.316   |
| GO:0032663 | regulation of interleukin-2 production                     | BP       | 0.06     | 50       | 5.664   |
| GO:0002687 | positive regulation of leukocyte migration                 | BP       | 0.05882  | 119      | 8.571   |
| GO:0097530 | granulocyte migration                                      | BP       | 0.05825  | 103      | 7.885   |
| GO:0032649 | regulation of interferon-gamma production                  | BP       | 0.05556  | 90       | 6.996   |
| GO:0071621 | granulocyte chemotaxis                                     | BP       | 0.05495  | 91       | 6.951   |
| GO:0032623 | interleukin-2 production                                   | BP       | 0.05455  | 55       | 5.354   |
| GO:0060986 | endocrine hormone secretion                                | BP       | 0.05357  | 56       | 5.297   |
| GO:0048145 | regulation of fibroblast proliferation                     | BP       | 0.05319  | 94       | 6.818   |
| GO:0042108 | positive regulation of cytokine biosynthetic process       | BP       | 0.05263  | 57       | 5.241   |
| GO:0048144 | fibroblast proliferation                                   | BP       | 0.05263  | 95       | 6.775   |
| GO:0032609 | interferon-gamma production                                | BP       | 0.05051  | 99       | 6.61    |
| GO:0050921 | positive regulation of chemotaxis                          | BP       | 0.04959  | 121      | 7.165   |
| GO:0045766 | positive regulation of angiogenesis                        | BP       | 0.04918  | 122      | 7.13    |
| GO:0060021 | palate development                                         | BP       | 0.04706  | 85       | 5.66    |
| GO:0097529 | myeloid leukocyte migration                                | BP       | 0.04698  | 149      | 7.495   |
| GO:0002685 | regulation of leukocyte migration                          | BP       | 0.0443   | 158      | 7.231   |
| GO:0046660 | female sex differentiation                                 | BP       | 0.04386  | 114      | 6.065   |
| GO:1904018 | positive regulation of vasculature development             | BP       | 0.04348  | 138      | 6.612   |
| GO:0030595 | leukocyte chemotaxis                                       | BP       | 0.04217  | 166      | 7.013   |
| GO:0005179 | hormone activity                                           | MF       | 0.04167  | 96       | 5.25    |

|            |                                                      |    |         |     |       |
|------------|------------------------------------------------------|----|---------|-----|-------|
| GO:0090575 | RNA polymerase II transcription factor complex       | CC | 0.03883 | 103 | 5.021 |
| GO:0046661 | male sex differentiation                             | BP | 0.03788 | 132 | 5.53  |
| GO:0050920 | regulation of chemotaxis                             | BP | 0.03681 | 163 | 5.953 |
| GO:0005125 | cytokine activity                                    | MF | 0.03509 | 171 | 5.771 |
| GO:0008406 | gonad development                                    | BP | 0.03243 | 185 | 5.479 |
| GO:0060326 | cell chemotaxis                                      | BP | 0.03211 | 218 | 5.884 |
| GO:0045137 | development of primary sexual characteristics        | BP | 0.03209 | 187 | 5.439 |
| GO:0002237 | response to molecule of bacterial origin             | BP | 0.0307  | 228 | 5.709 |
| GO:0007548 | sex differentiation                                  | BP | 0.03017 | 232 | 5.642 |
| GO:0050900 | leukocyte migration                                  | BP | 0.02985 | 268 | 5.994 |
| GO:0032103 | positive regulation of response to external stimulus | BP | 0.02857 | 245 | 5.435 |
| GO:0032496 | response to lipopolysaccharide                       | BP | 0.02844 | 211 | 5.009 |
| GO:0045765 | regulation of angiogenesis                           | BP | 0.02844 | 211 | 5.009 |
| GO:0048608 | reproductive structure development                   | BP | 0.02488 | 402 | 5.91  |
| GO:0061458 | reproductive system development                      | BP | 0.02463 | 406 | 5.868 |
| GO:0030335 | positive regulation of cell migration                | BP | 0.02445 | 409 | 5.836 |
| GO:2000147 | positive regulation of cell motility                 | BP | 0.02375 | 421 | 5.714 |
| GO:0051272 | positive regulation of cellular component movement   | BP | 0.02315 | 432 | 5.605 |
| GO:0040017 | positive regulation of locomotion                    | BP | 0.02227 | 449 | 5.445 |
| GO:0044057 | regulation of system process                         | BP | 0.02193 | 456 | 5.381 |
| GO:0002009 | morphogenesis of an epithelium                       | BP | 0.02053 | 487 | 5.113 |

---
