# Supplementary material for: The conserved protective cyclic AMP-phosphodiesterase function PDE4B is expressed in the adenoma and adjacent normal colonic epithelium of mammals and silenced in colorectal cancer
Source: PubMed Central journal article supplement (PMC6143270; doi:10.1371/journal.pgen.1007611), 2018-09-06
Supplement: pgen.1007611.s003.pdf [file pgen.1007611.s003.pdf]

**S3 Table.** Results of gene-set enrichment analysis for 14 genes associated with decreased expression in colonic adenoma in all three genera. Shown are enriched GO terms at z-score exceeding 5.0 ( $p < 1e-6$ ), set size at least 10 genes, and containing at least 3 adenoma-associated genes. Below, column set.mean is the proportion of the GO category that are triply conserved adenoma-associated genes. Computed with *allez* [70].

| ID         | Term                                      | Ontology | set.mean | set.size | z.score |
|------------|-------------------------------------------|----------|----------|----------|---------|
| GO:0007605 | sensory perception of sound               | BP       | 0.02256  | 133      | 8.395   |
| GO:0050954 | sensory perception of mechanical stimulus | BP       | 0.01911  | 157      | 7.675   |
| GO:0007623 | circadian rhythm                          | BP       | 0.01676  | 179      | 7.144   |
| GO:0015850 | organic hydroxy compound transport        | BP       | 0.01538  | 195      | 6.813   |
| GO:0022804 | active transmembrane transporter activity | MF       | 0.01242  | 322      | 6.994   |
| GO:0016324 | apical plasma membrane                    | CC       | 0.01103  | 272      | 5.642   |
| GO:0048511 | rhythmic process                          | BP       | 0.01031  | 291      | 5.425   |
