# Supplementary material for: The conserved protective cyclic AMP-phosphodiesterase function PDE4B is expressed in the adenoma and adjacent normal colonic epithelium of mammals and silenced in colorectal cancer
Source: PubMed Central journal article supplement (PMC6143270; doi:10.1371/journal.pgen.1007611), 2018-09-06
Supplement: pgen.1007611.s007.pdf [file pgen.1007611.s007.pdf]

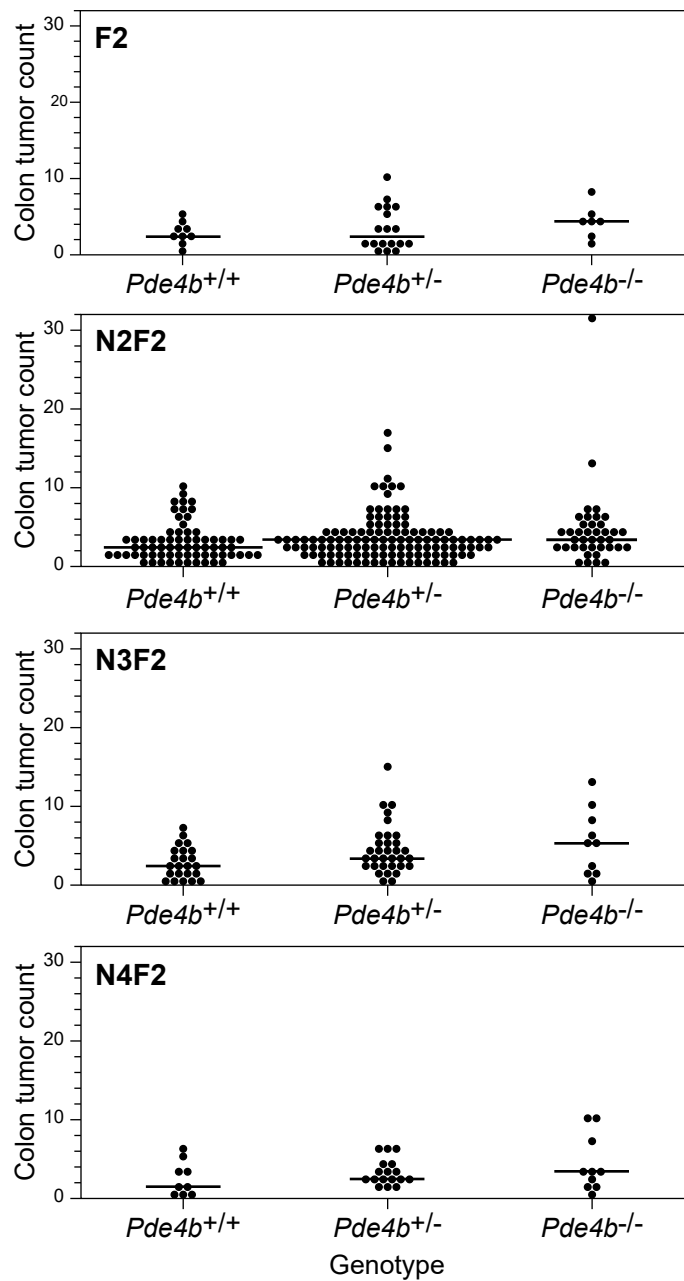

**S4 Figure.** Dot plots of the colon tumor count data summarized in Table 1. Medians are indicated by horizontal lines.
