# Supplementary material for: The conserved protective cyclic AMP-phosphodiesterase function PDE4B is expressed in the adenoma and adjacent normal colonic epithelium of mammals and silenced in colorectal cancer
Source: PubMed Central journal article supplement (PMC6143270; doi:10.1371/journal.pgen.1007611), 2018-09-06
Supplement: pgen.1007611.s008.pdf [file pgen.1007611.s008.pdf]

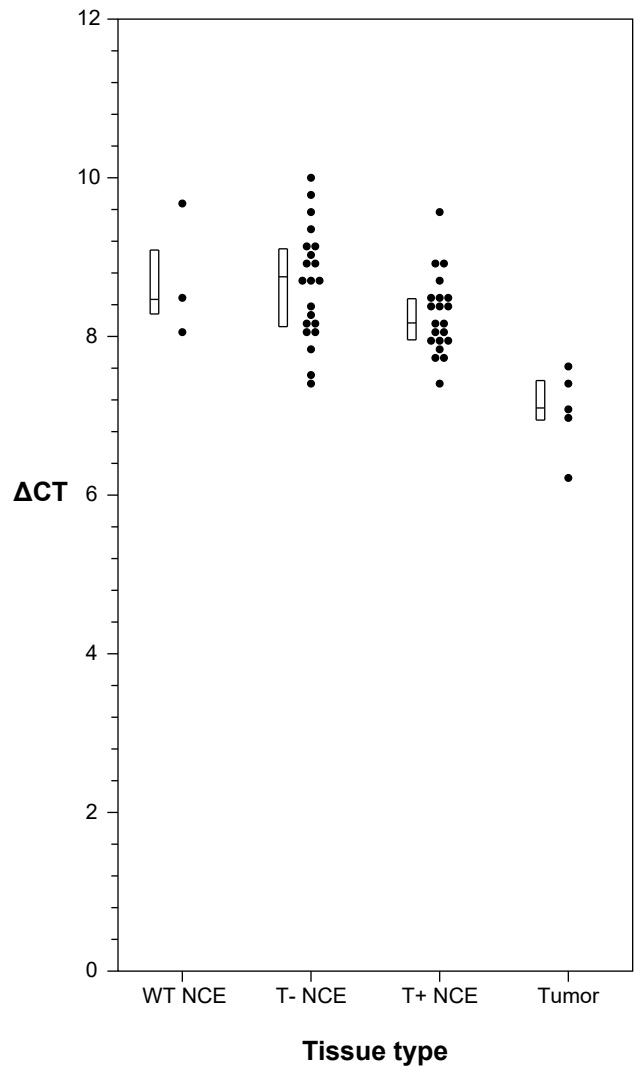

**S5 Figure.** Real time PCR results for transcripts of the normal colonic epithelium (NCE) whose level differ between *Apc<sup>Min/+</sup>* mice bearing colonic adenomas (T+) and *Apc<sup>Min/+</sup>* mice free of colonic tumors (T-). The cycle number ( $\Delta CT$ ), normalized to GAPDH, is shown on the Y axis. Each dot represents the average of triplicate values from an individual sample. Medians and quartiles for each tissue type are indicated. WT, wildtype.
